# Supplementary material for: UGCG overexpression leads to increased glycolysis and increased oxidative phosphorylation of breast cancer cells
Source: PubMed Central journal article supplement (PMC7234995; doi:10.1038/s41598-020-65182-y), 2020-05-18
Supplement: 41598_2020_65182_MOESM1_ESM.pdf [file 41598_2020_65182_MOESM1_ESM.pdf]

# **UGCG overexpression leads to increased glycolysis and increased oxidative phosphorylation of breast cancer cells**

Nina Schömel<sup>1</sup>, Lisa Gruber<sup>1</sup>, Stephanie J. Alexopoulos<sup>2</sup>, Sandra Trautmann<sup>1</sup>, Ellen M. Olzomer<sup>2</sup>, Frances L. Byrne<sup>2</sup>, Kyle L. Hoehn<sup>2</sup>, Robert Gurke<sup>1,3</sup>, Dominique Thomas<sup>1</sup>, Nerea Ferreirós<sup>1</sup>, Gerd Geisslinger<sup>1,3</sup>, Marthe-Susanna Wegner<sup>1,2</sup>

<sup>1</sup>*pharmazentrum frankfurt/ZAFES*, Institute of Clinical Pharmacology, Johann Wolfgang Goethe University, Theodor Stern-Kai 7, 60590 Frankfurt am Main, Germany.

<sup>2</sup>School of Biotechnology and Biomolecular Sciences, University of New South Wales, Sydney, New South Wales 2052, Australia.

<sup>3</sup>Fraunhofer Institute for Molecular Biology and Applied Ecology IME, Project Group Translational Medicine and Pharmacology (TMP), Theodor Stern-Kai 7, 60590 Frankfurt am Main, Germany.

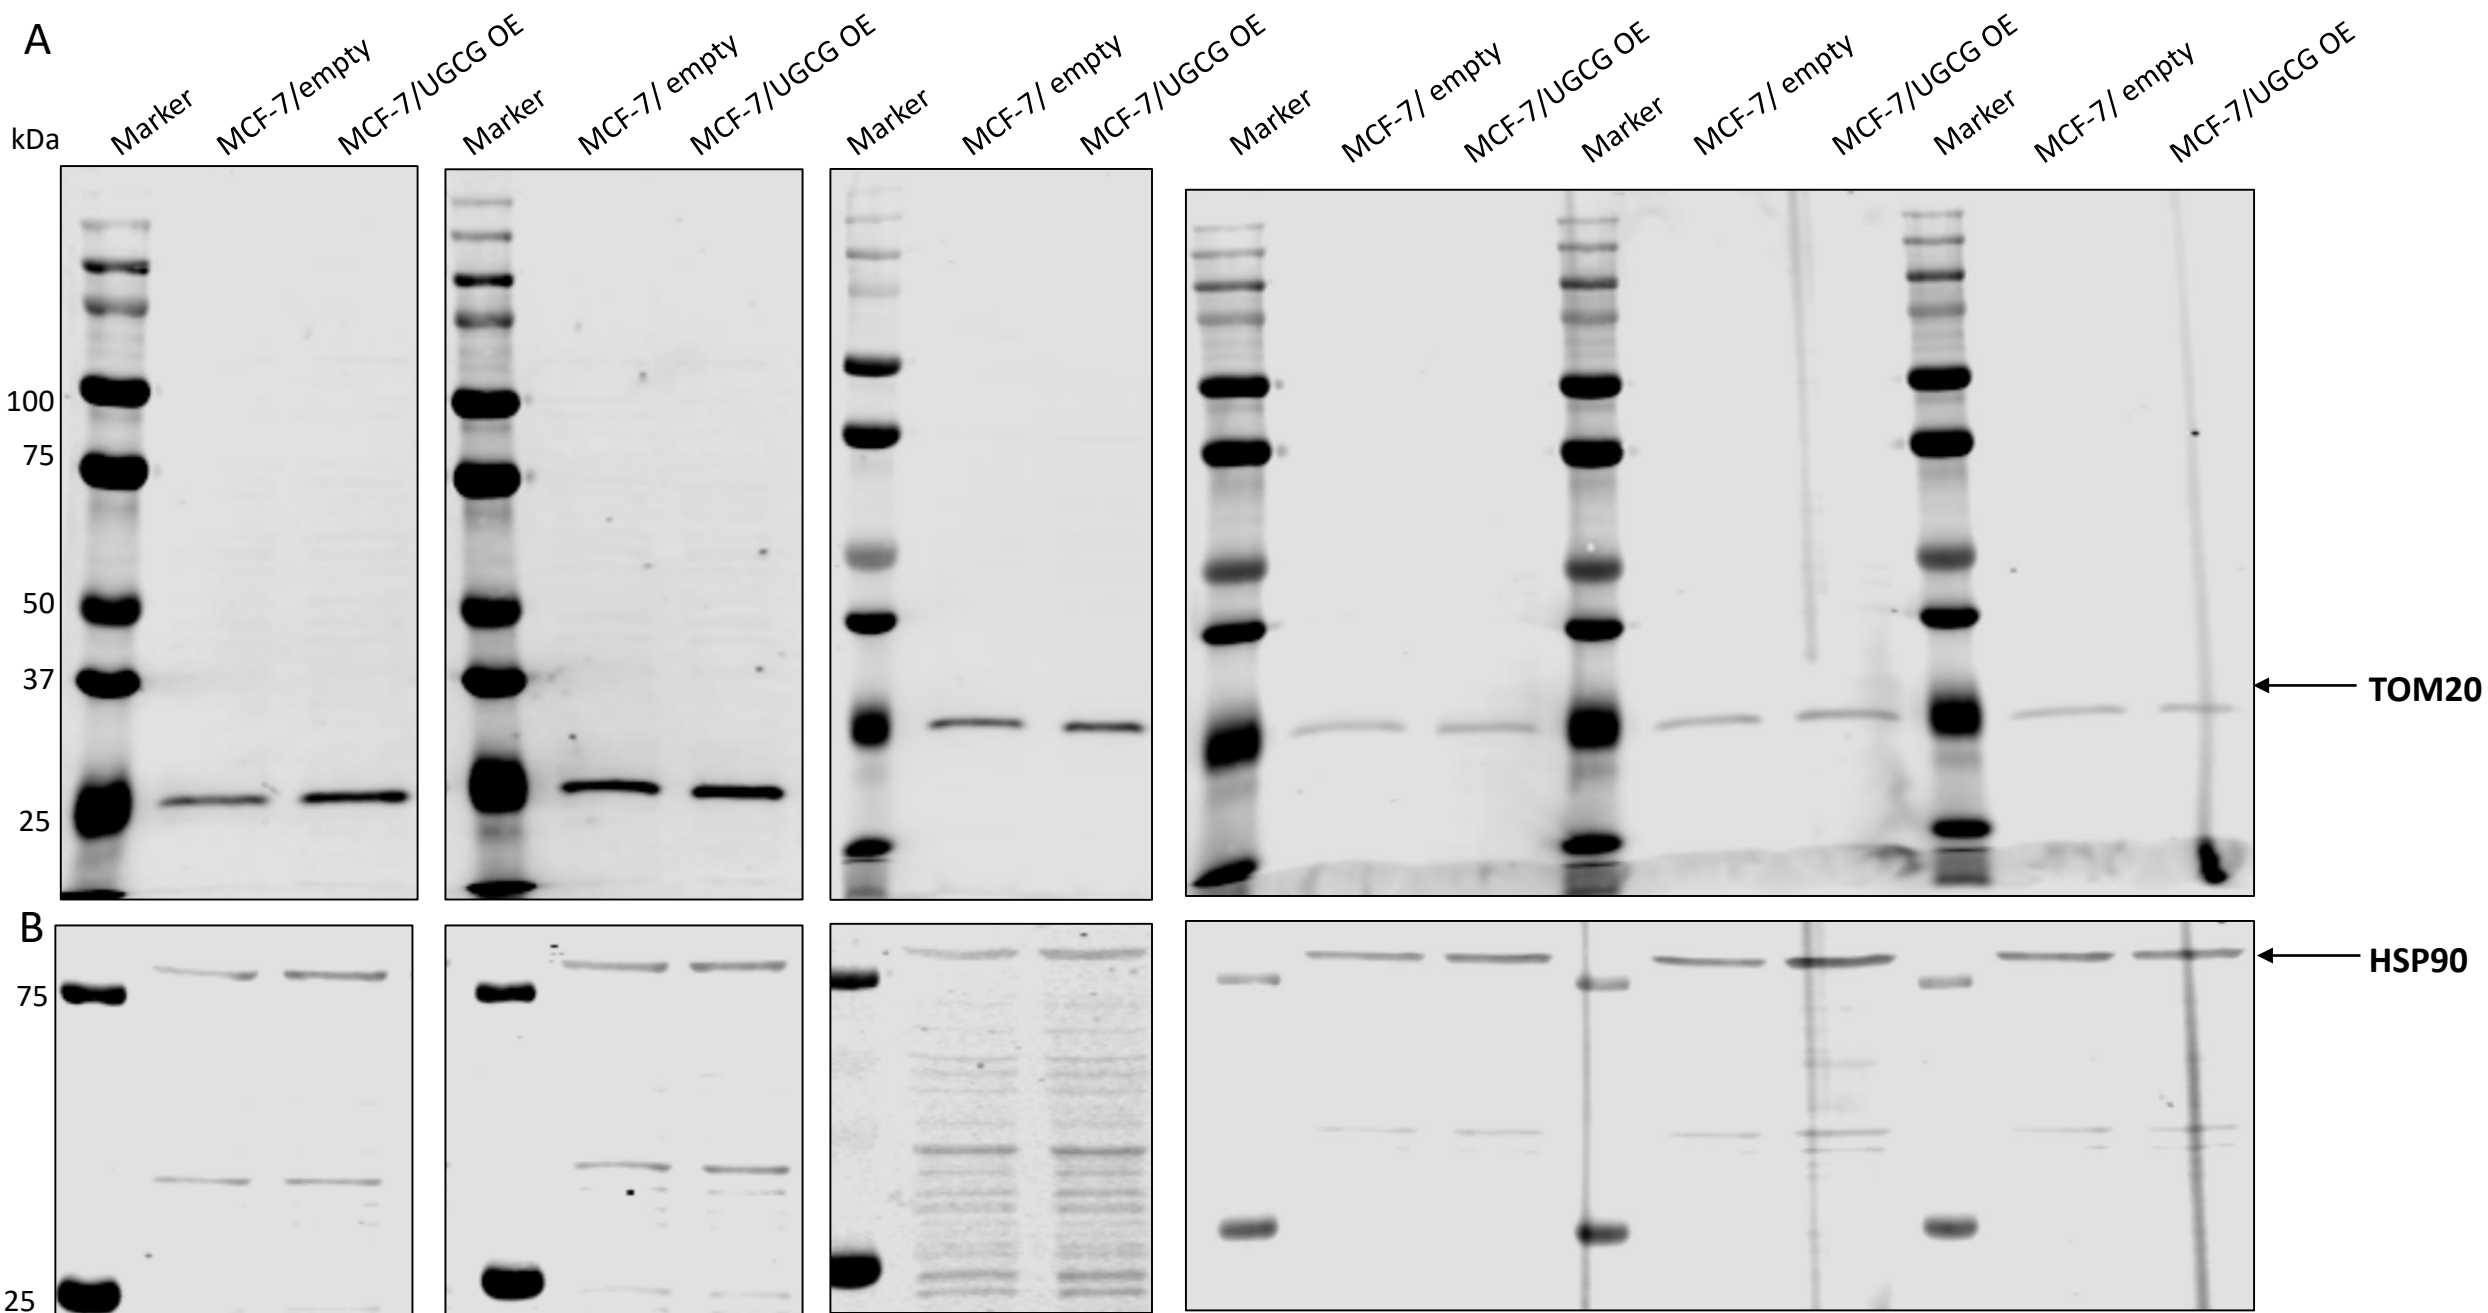

**Analysis mitochondrial dynamics by Western Blot.** (A) *Translocase of the outer mitochondrial membrane 20* (TOM20) protein Western Blots of all experiments. (B) *Heat shock protein 90* (HSP90) protein Western Blots of all experiments.

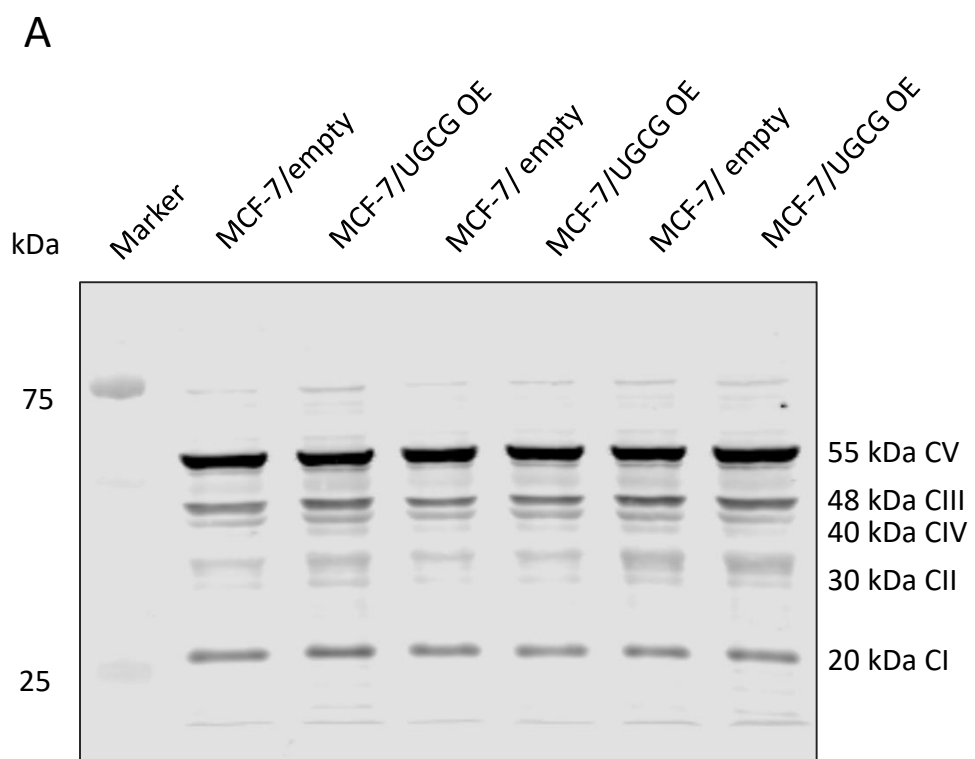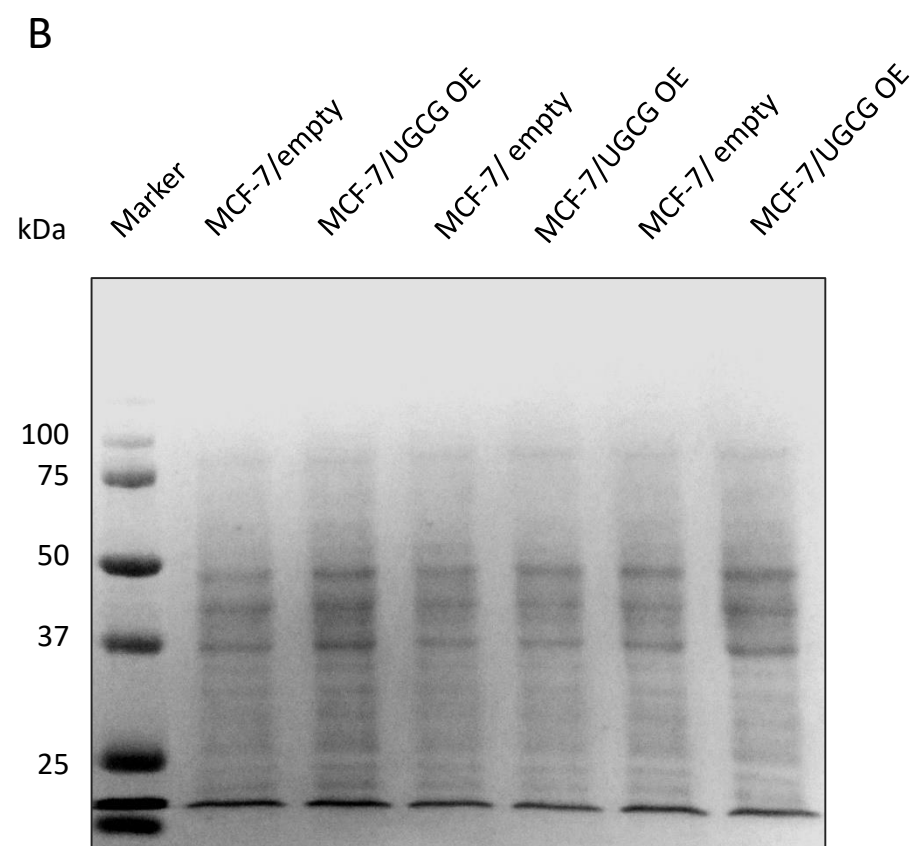

**Analysis of OXPPOS protein concentrations by Western Blot.** (A) OXPPOS protein Western Blots of all experiments. (B) Ponceau dye of all experiments. C = complex.

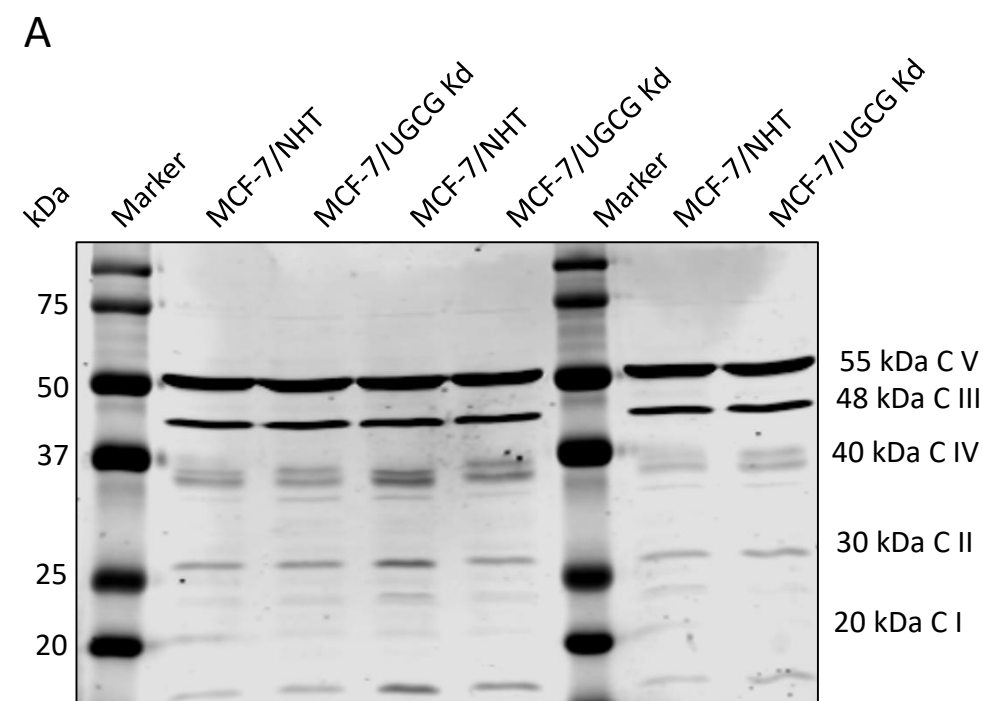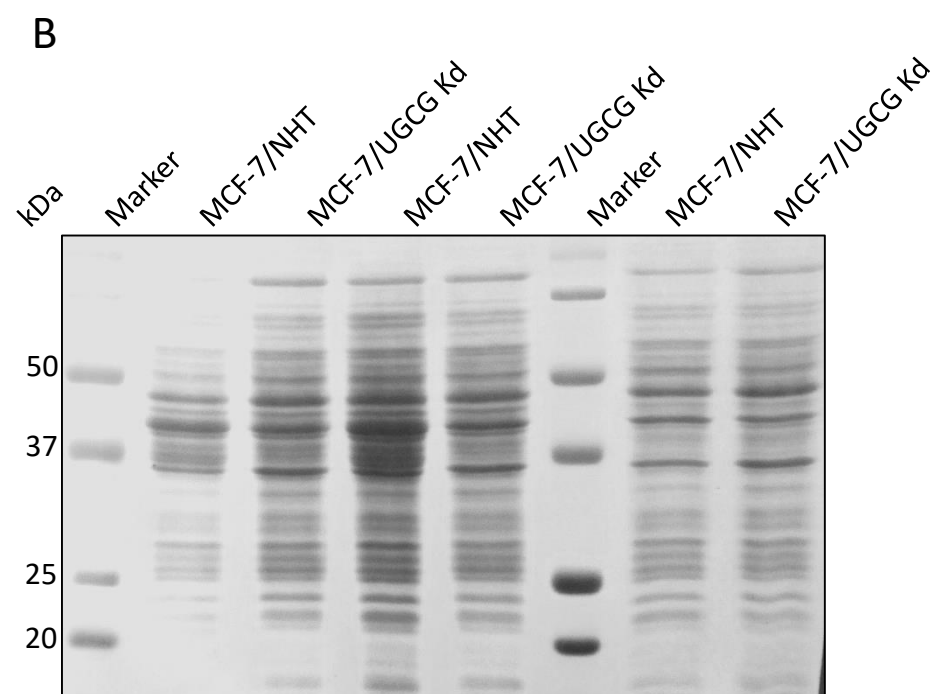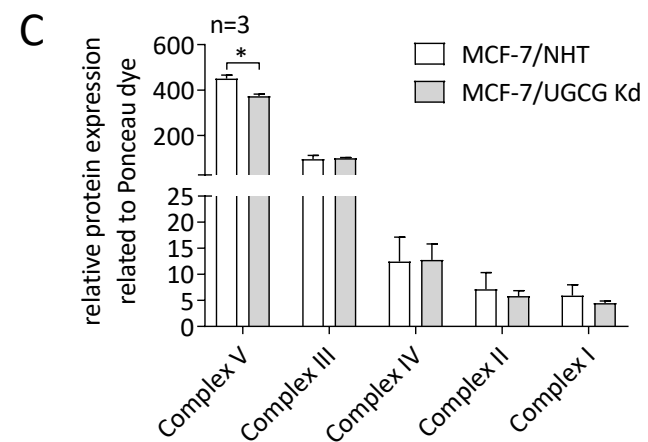

**Determination of OXPHOS protein concentrations by Western Blot analysis.** MCF-7/UGCG knockdown (Kd) cells were generated as described previously [6]. NHT = non-human target control cells. C = complex. (A) OXPHOS protein Western Blots of all experiments. (B) Ponceau dye of all experiments. (C) Densitometrical analysis of OXPHOS complexes I-V protein concentrations by Western blot analysis. Protein expression is related to Ponceau dye. Data are presented as a mean of  $n = 3 \pm \text{SEM}$ . , \*\*\* $p \leq 0.001$ ..

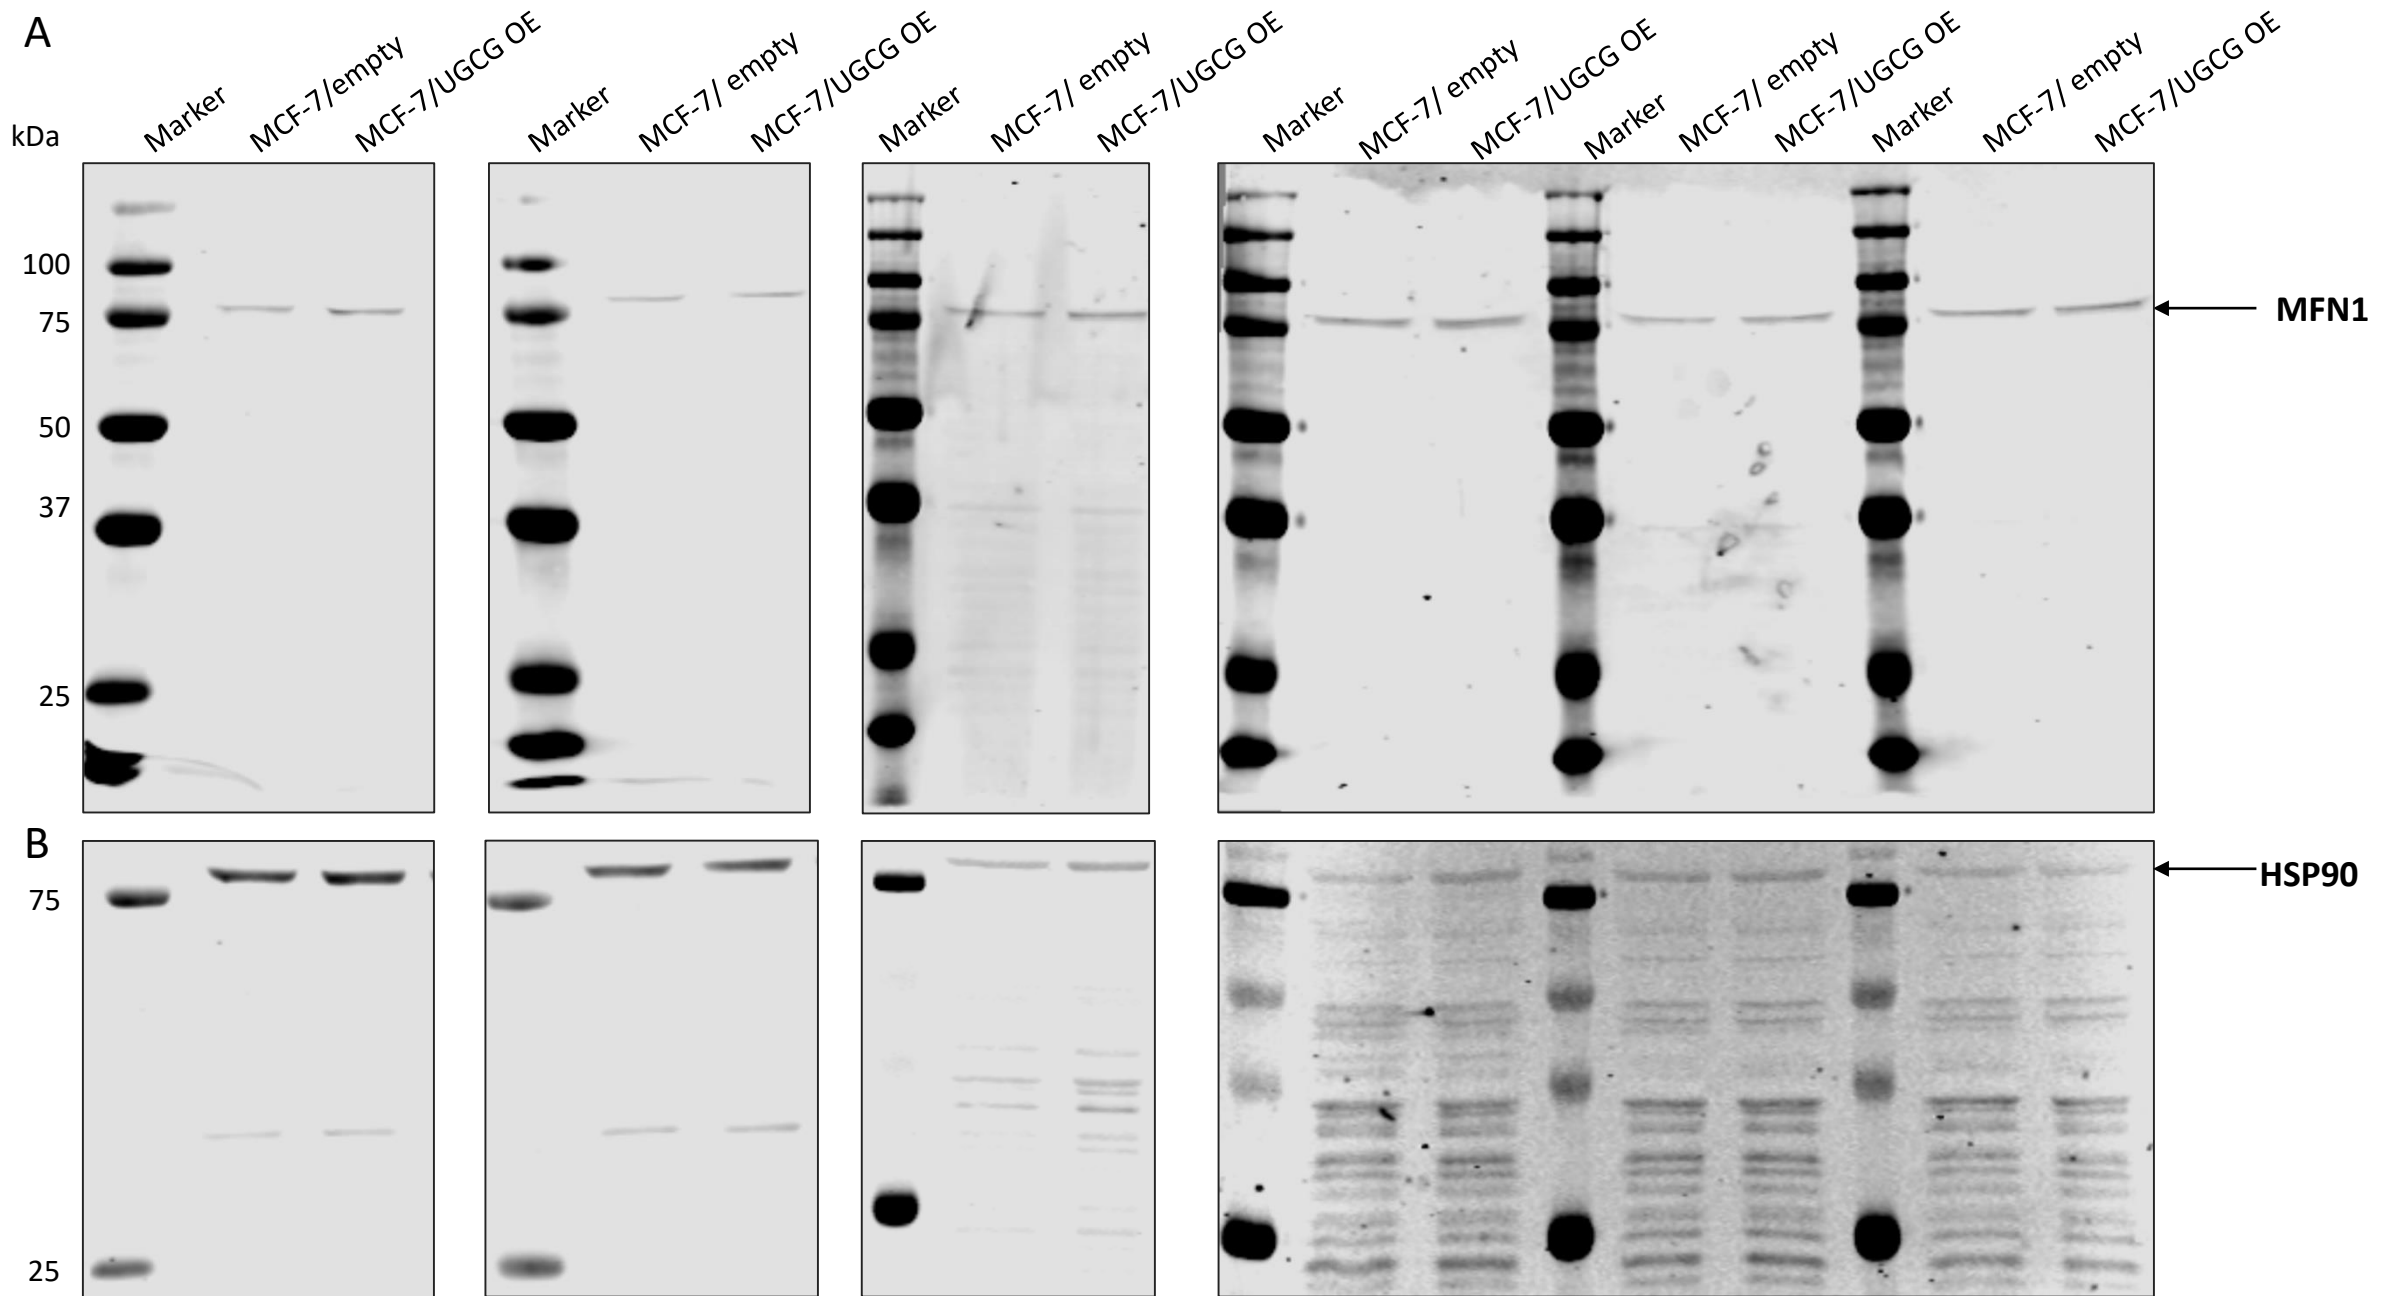

**Analysis mitochondrial dynamics by Western Blot.** (A) *Mitofusin 1* (MFN1) protein Western Blots of all experiments. (B) *Heat shock protein 90* (HSP90) protein Western Blots of all experiments.

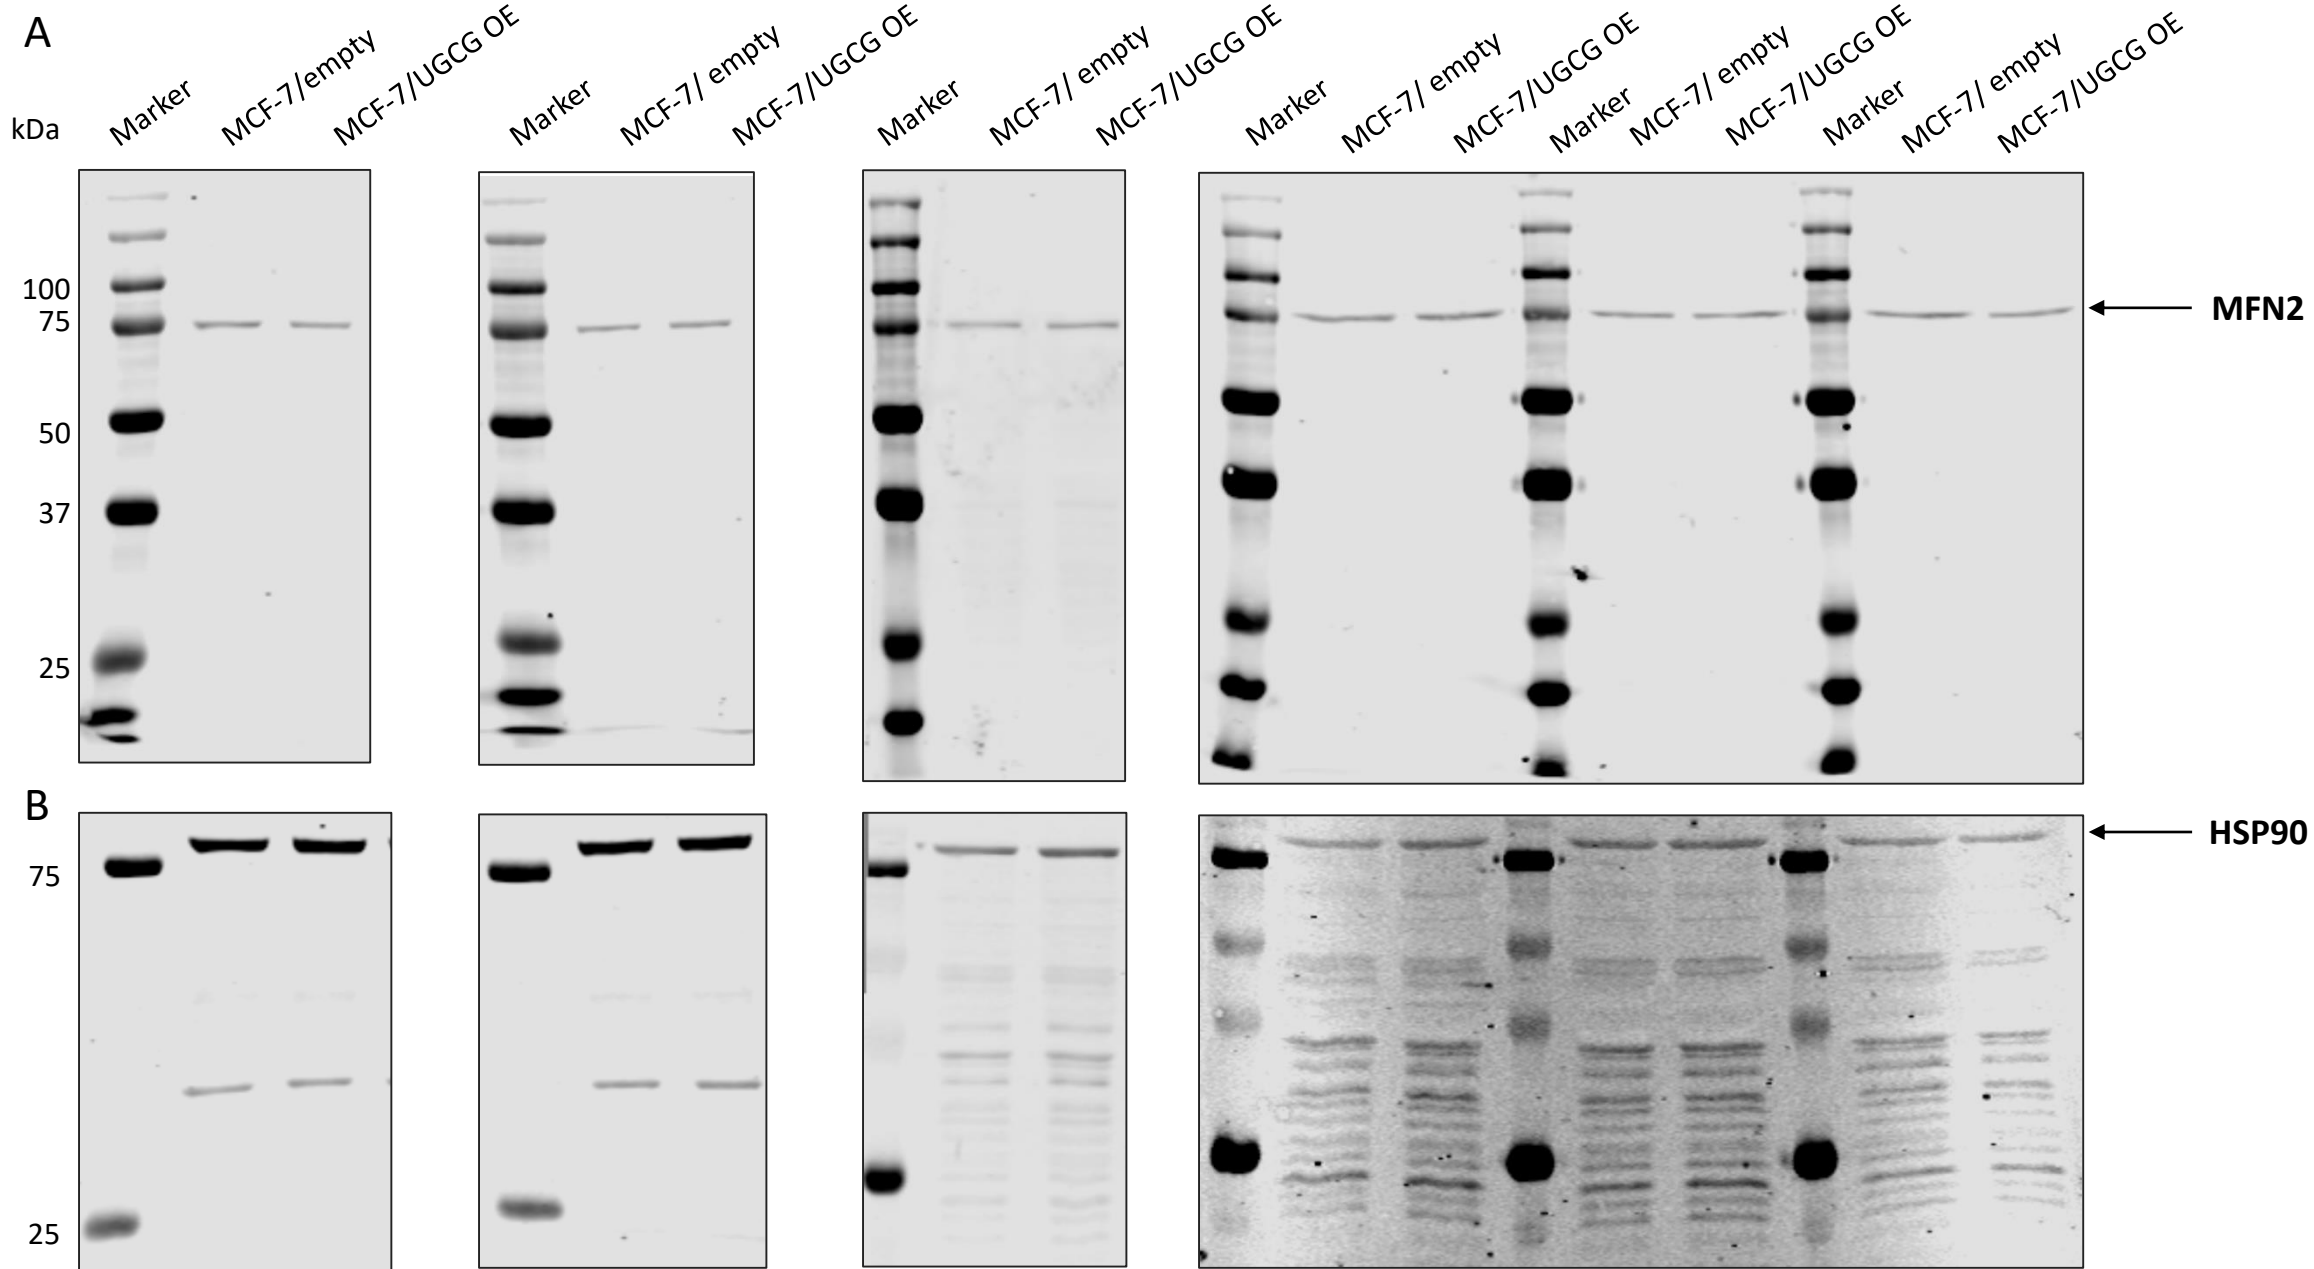

**Analysis mitochondrial dynamics by Western Blot.** (A) *Mitofusin 2* (MFN2) protein Western Blots of all experiments. (B) *Heat shock protein 90* (HSP90) protein Western Blots of all experiments.

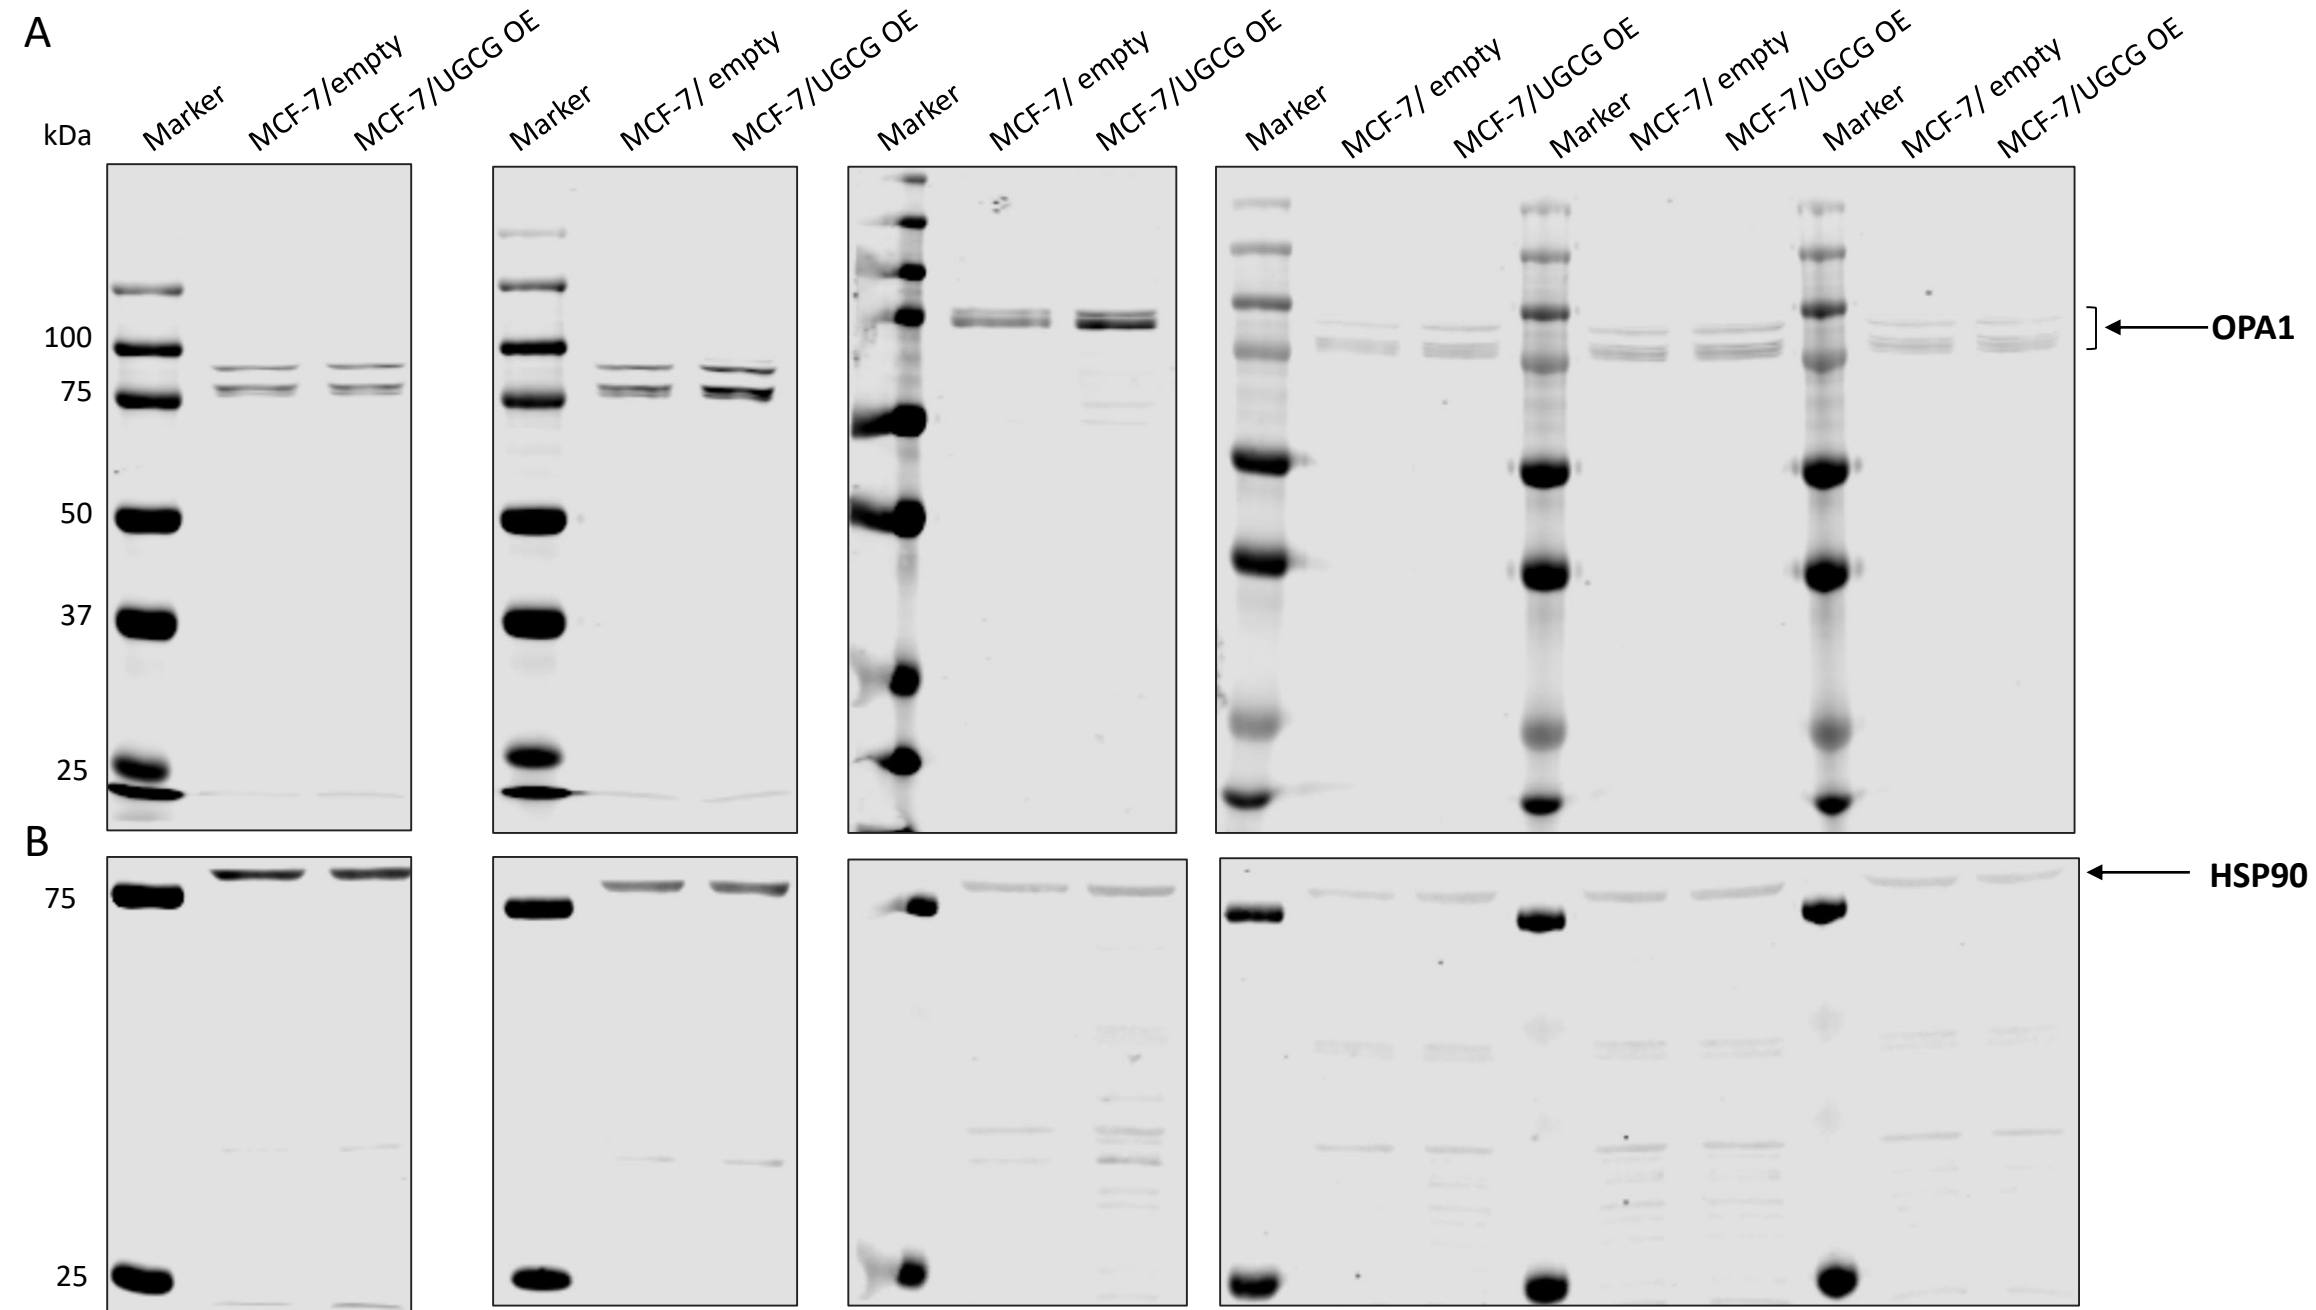

**Analysis mitochondrial dynamics by Western Blot.** (A) *Optic atrophy type 1* (OPA1) protein Western Blots of all experiments. (B) *Heat shock protein 90* (HSP90) protein Western Blots of all experiments.

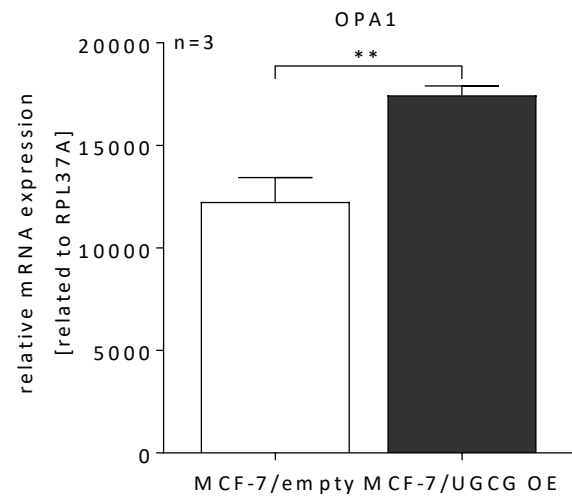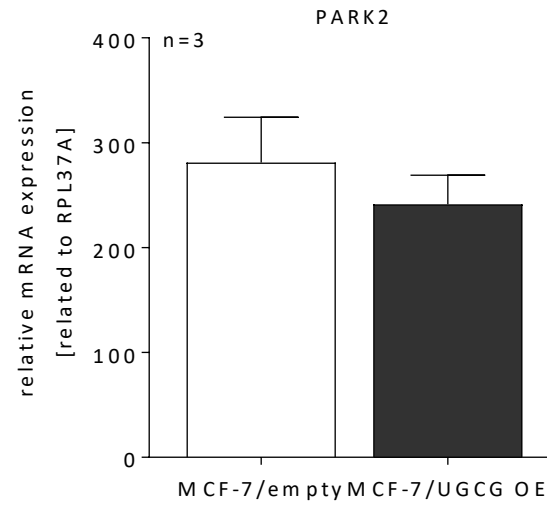

**Analysis of *optic atrophy type 1* (OPA1) and *Parkin 2* (PARK2) mRNA expression by qRT-PCR.** mRNA expression is related to the housekeeper RPL37A. Data are presented as a mean of  $n = 3 \pm \text{SEM}$ . \*\* $p \leq 0.01$ .



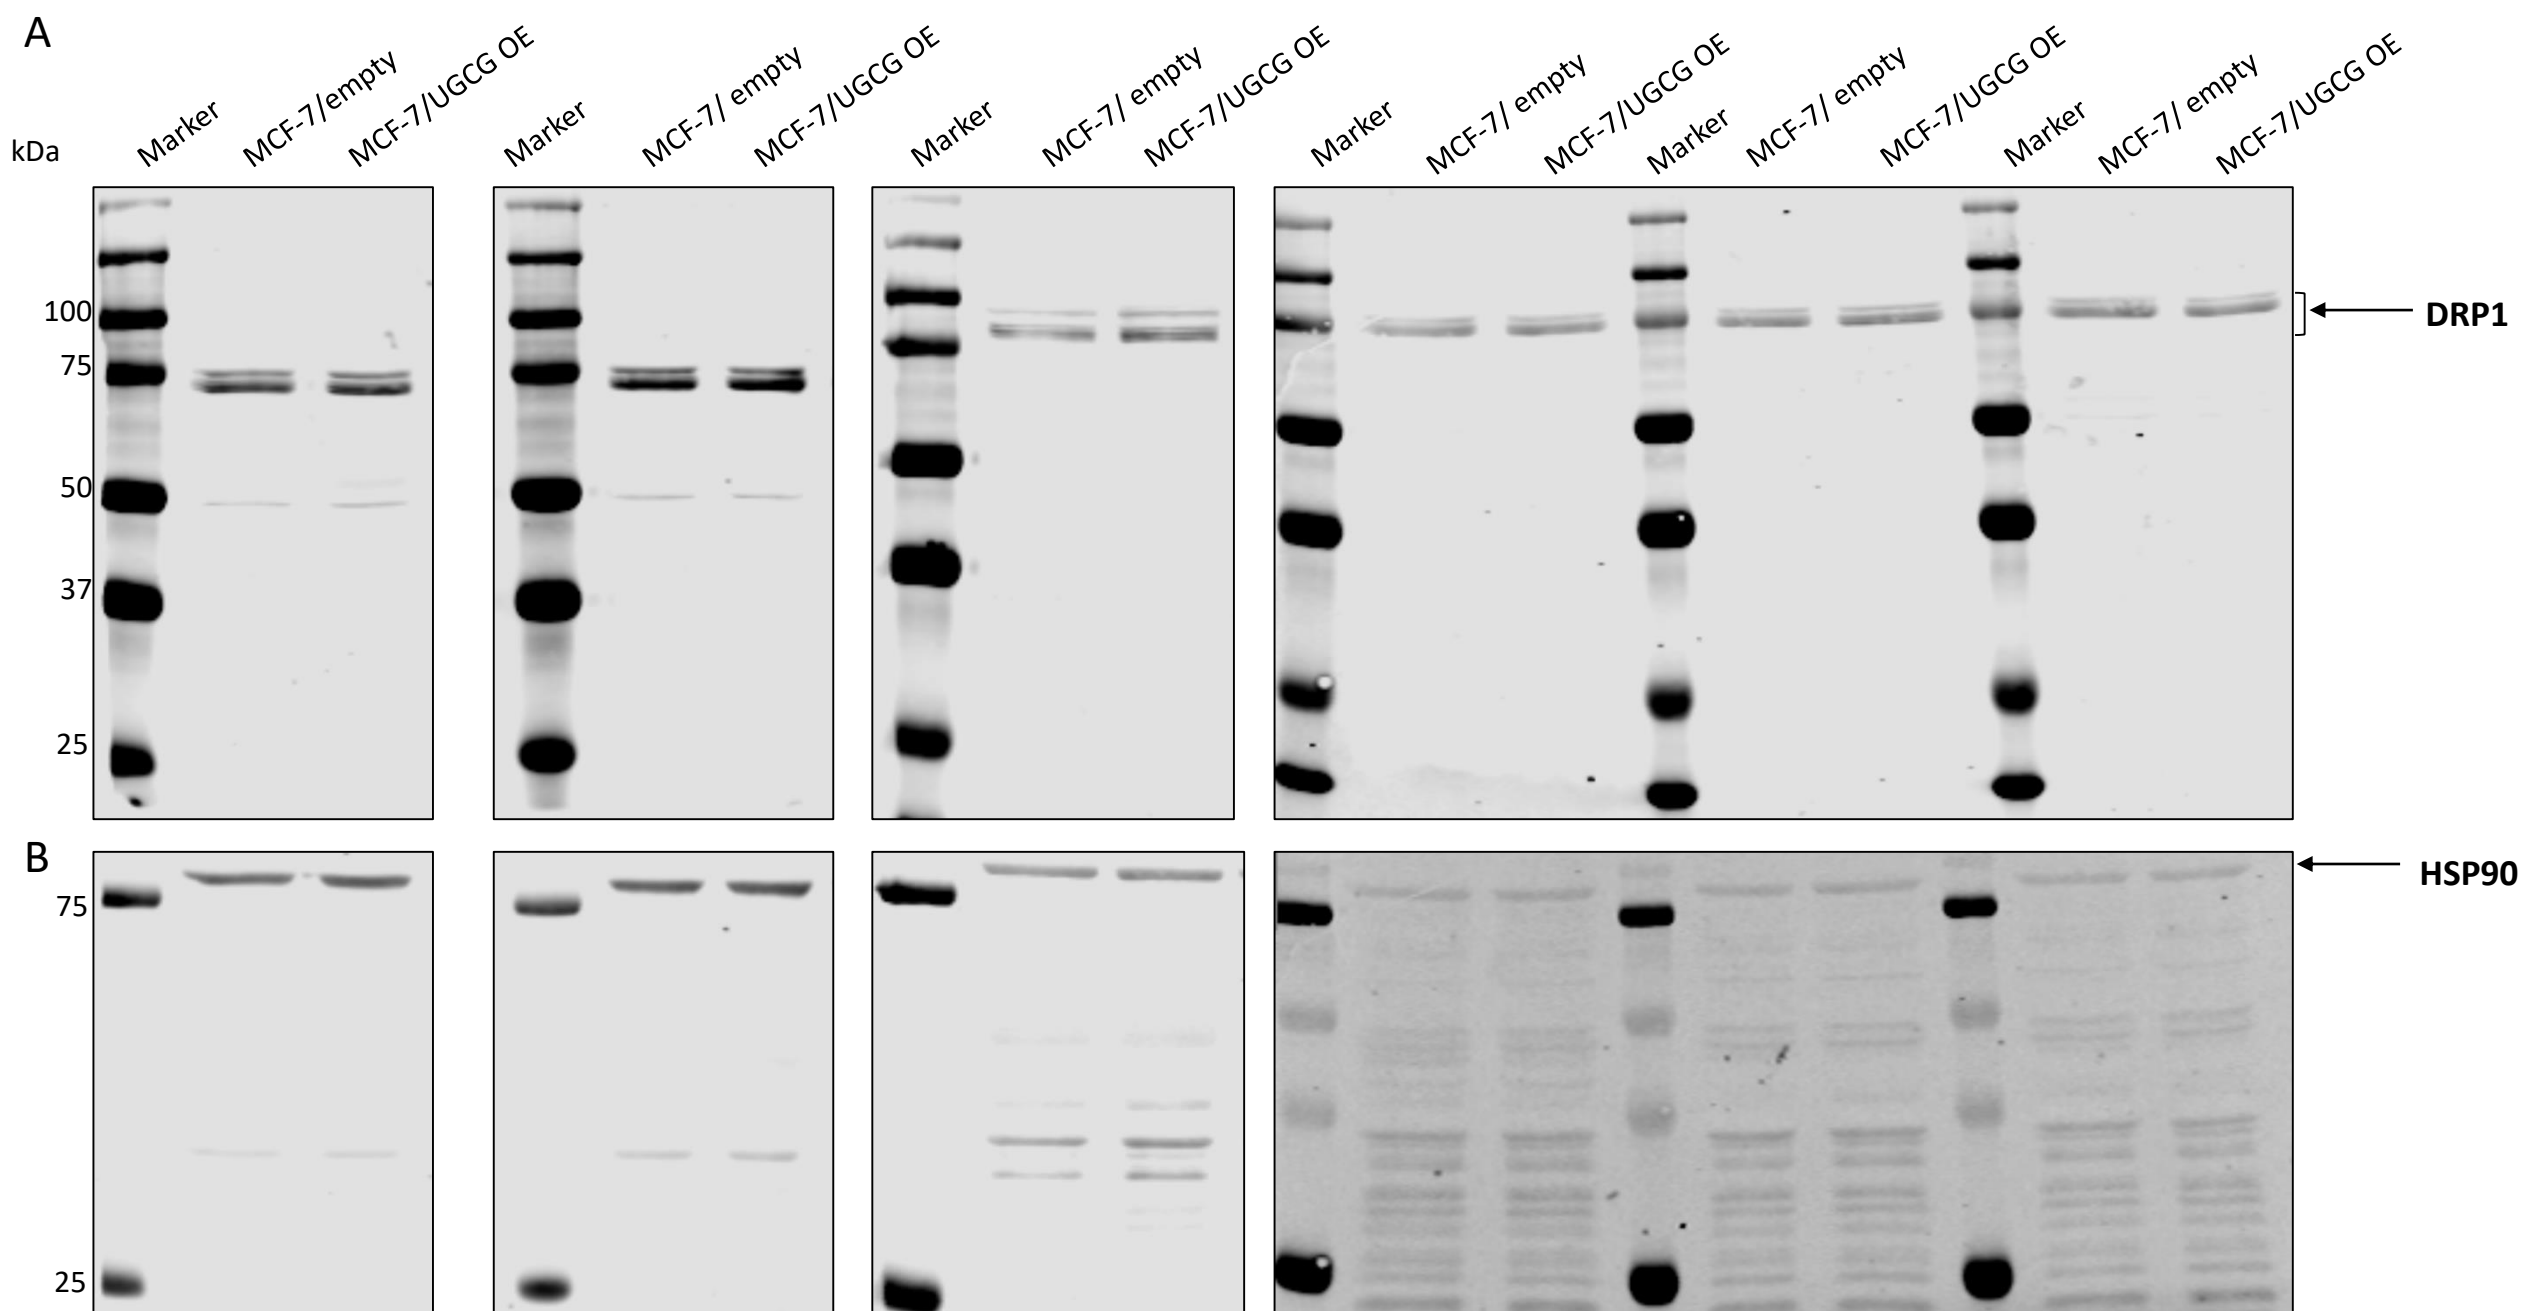

**Analysis mitochondrial dynamics by Western Blot.** (A) *Dynamin related protein1* (DRP1) protein Western Blots of all experiments. (B) *Heat shock protein 90* (HSP90) protein Western Blots of all experiments.

**A**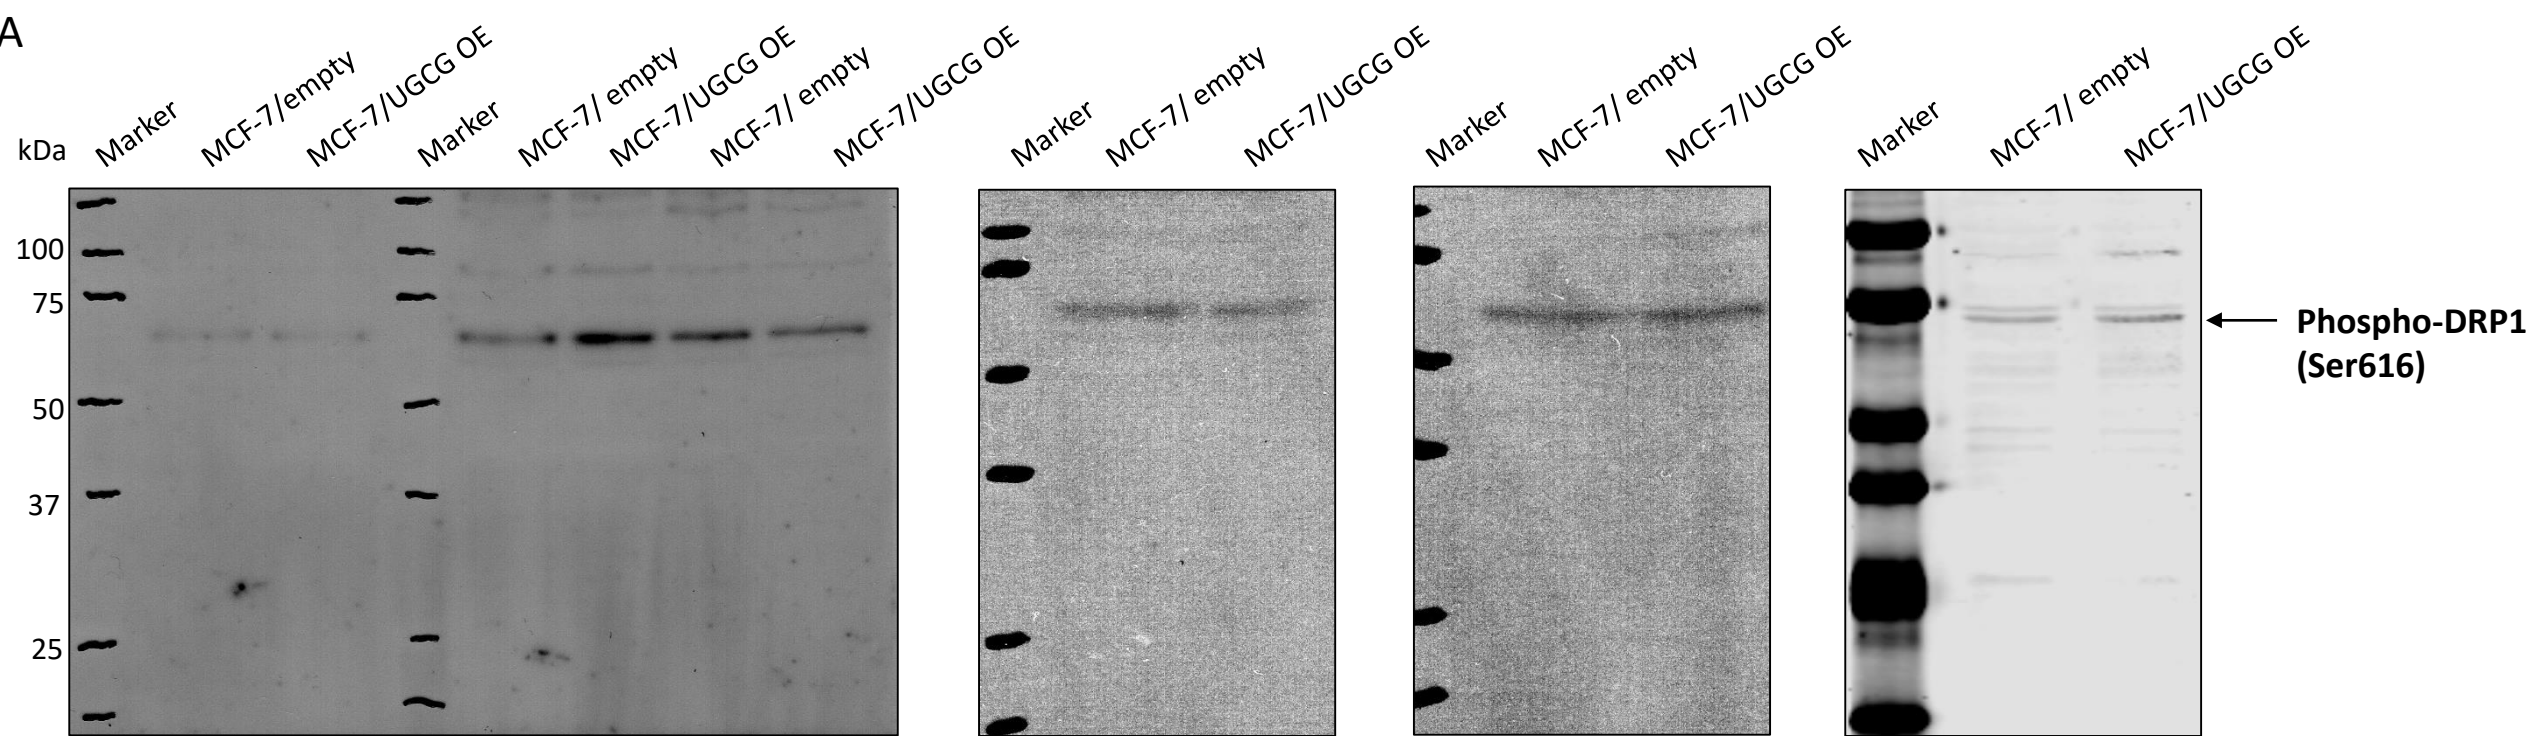**B**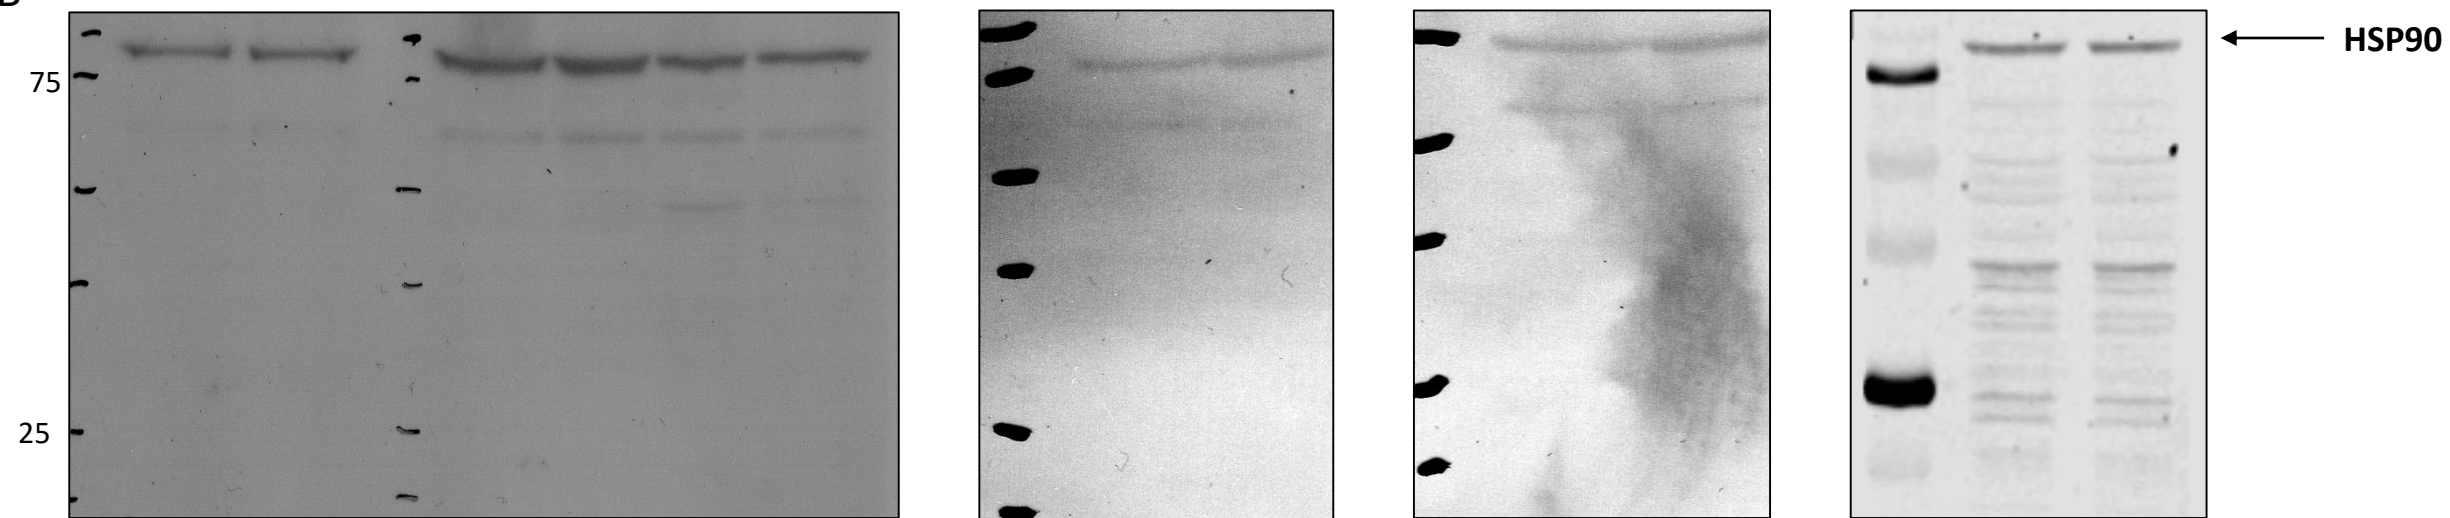

**Analysis mitochondrial dynamics by Western Blot.** (A) *Phospho-dynamin related protein1* (Phospho-DRP1) (Ser616) protein Western Blots of all experiments. (B) *Heat shock protein 90* (HSP90) protein Western Blots of all experiments.

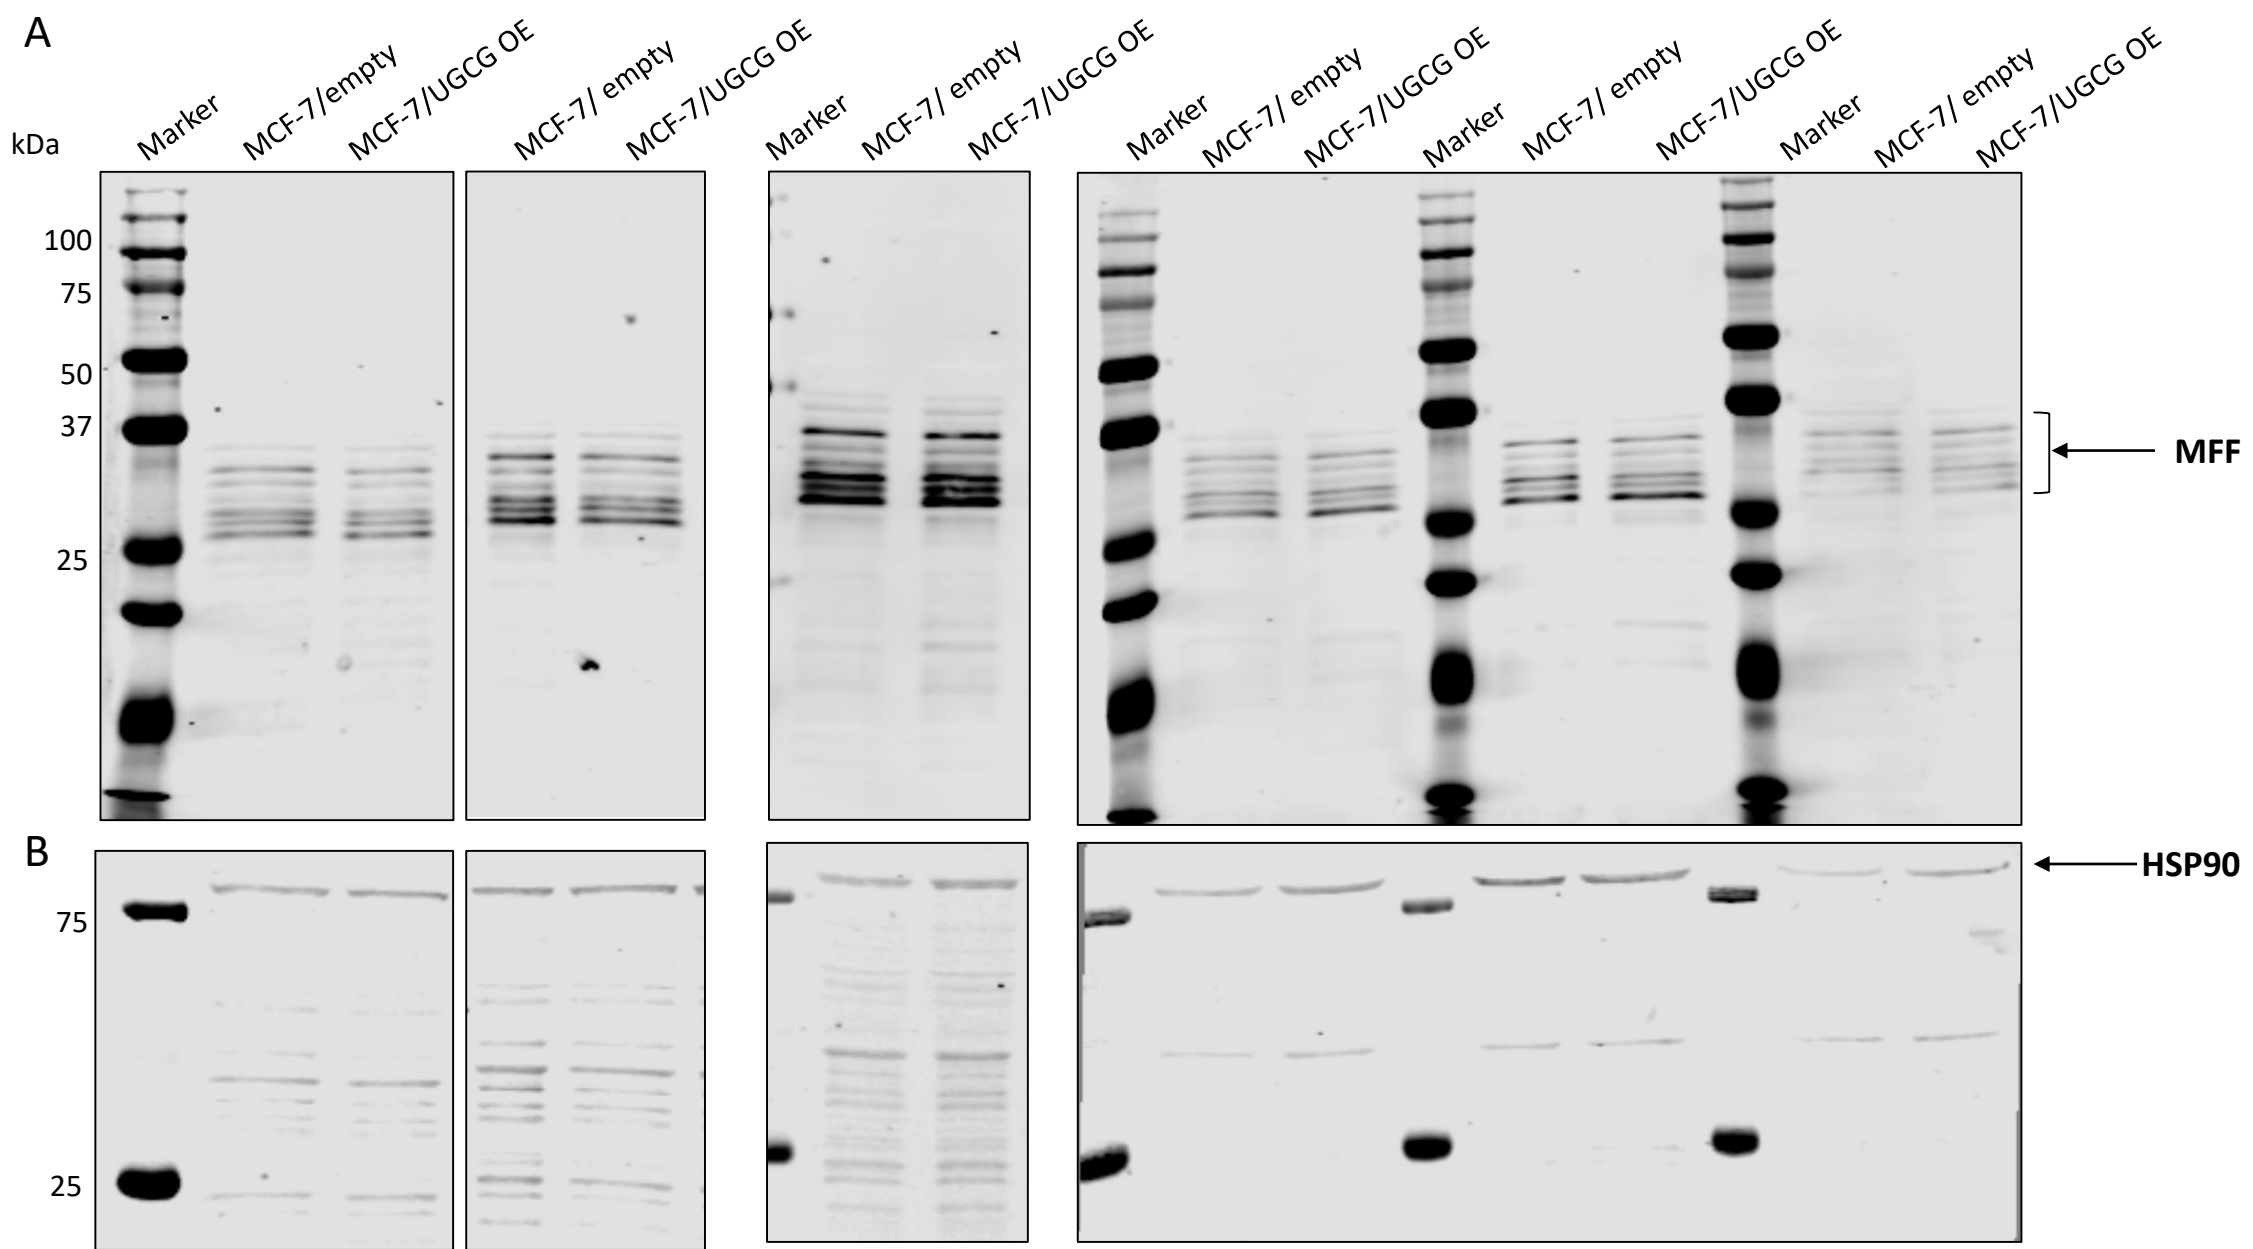

**Analysis mitochondrial dynamics by Western Blot.** (A) *Mitochondrial fission factor* (MFF) protein Western Blots of all experiments. (B) *Heat shock protein 90* (HSP90) protein Western Blots of all experiments.

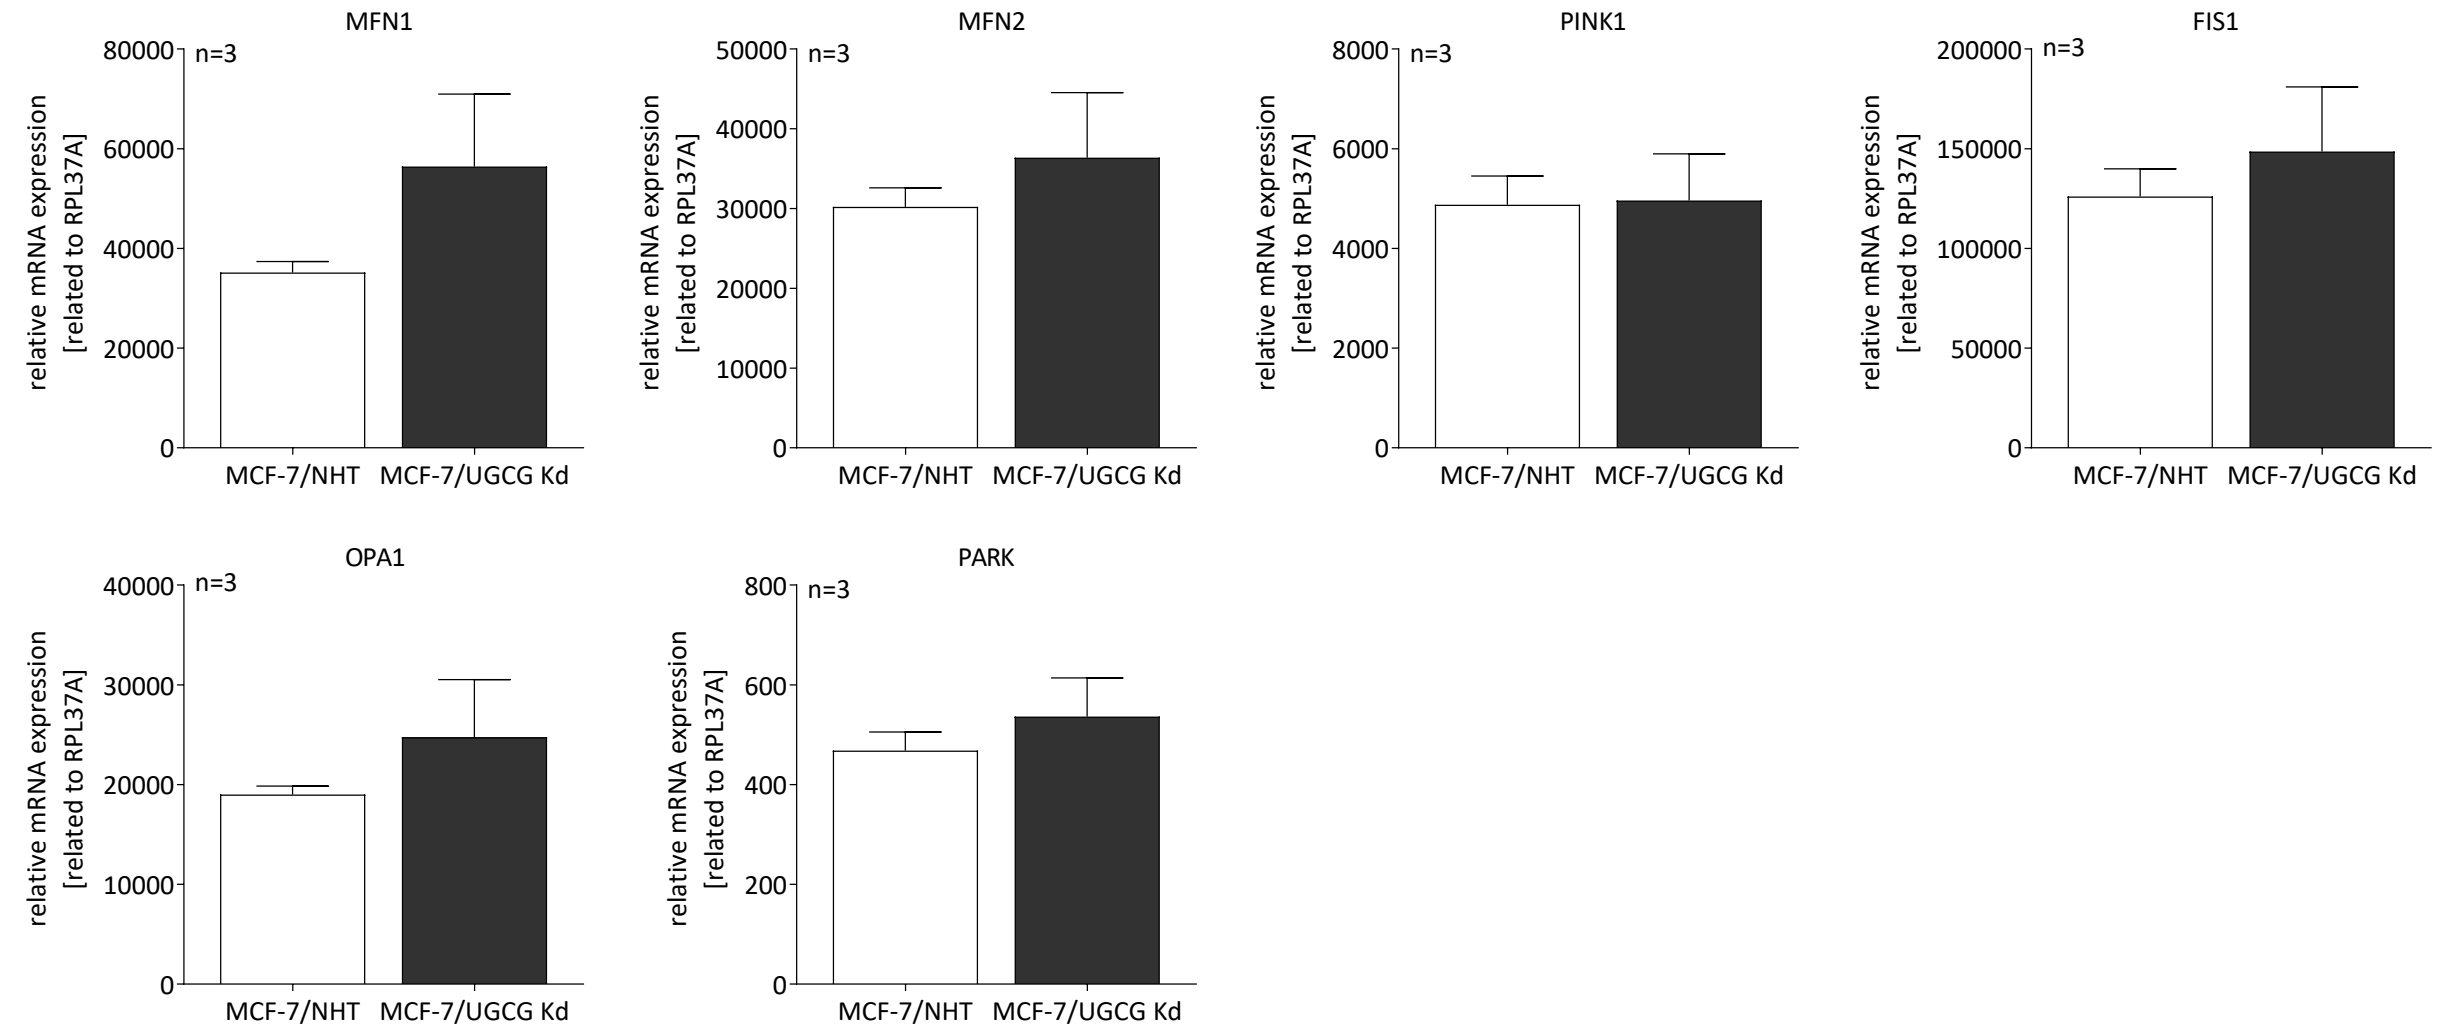

**Analysis of mRNA expression of fusion and fission proteins in MCF-7/UGCG Kd cells by qRT-PCR.** NHT = non-human target control, MFN1 = mitofusin 1, MFN2 = mitofusin 2, PINK1 = PTEN-induced kinase 1, FIS1 = mitochondrial fission protein 1, OPA1 = optic atrophy 1, PARK = parkin 2. mRNA expression is related to the housekeeper RPL37A. Data are presented as a mean of  $n = 3 \pm$  SEM.

A

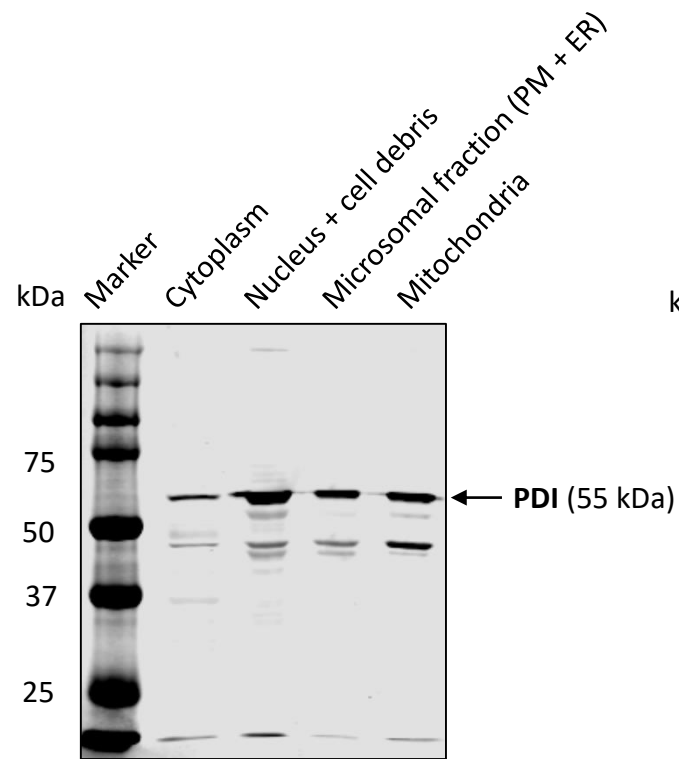

B

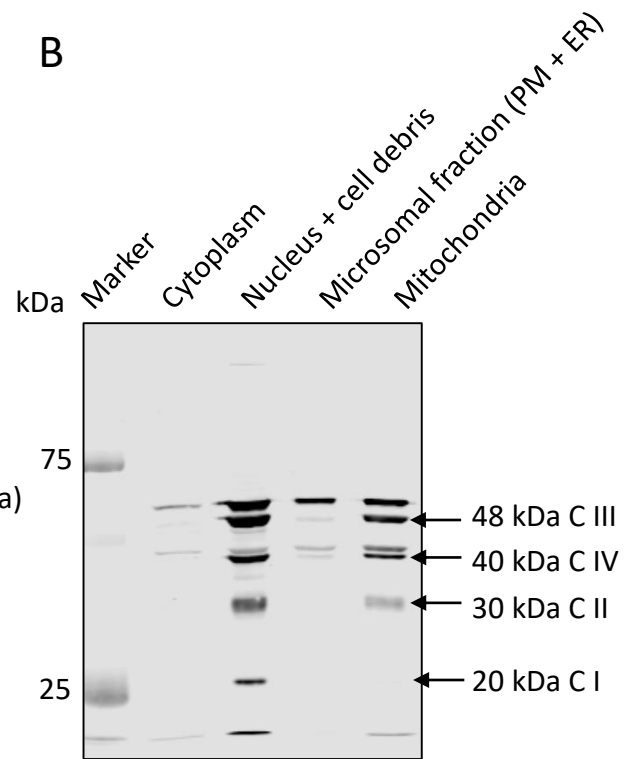

**ER/mitochondria fraction verified by PDI and OXPHOS protein detection.** (A) Representative image of anti-*protein disulfide isomerase* (PDI; ER marker) and (B) anti-Oxphos Rodent Western Blot Cocktail (mitochondria marker). PM = plasma membrane, ER = endoplasmic reticulum, C = Complex.

**Material and Methods: Western blot analysis of purity of ER/mitochondria fractions.** Isolated fractions were separated by 12 % SDS-PAGE as described in section *Protein concentration determination by Western blot analysis*. Anti-PDI antibody (ab2792, Abcam, Cambridge, UK) (1:250 in blocking solution) was applied overnight at 4 °C. The IRDye®680 conjugated secondary antibody (LI-COR Biosciences, Bad Homburg, Germany), and anti-OXPHOS rodent Western Blot Cocktail were applied as described in section *Protein concentration determination by Western blot analysis*.

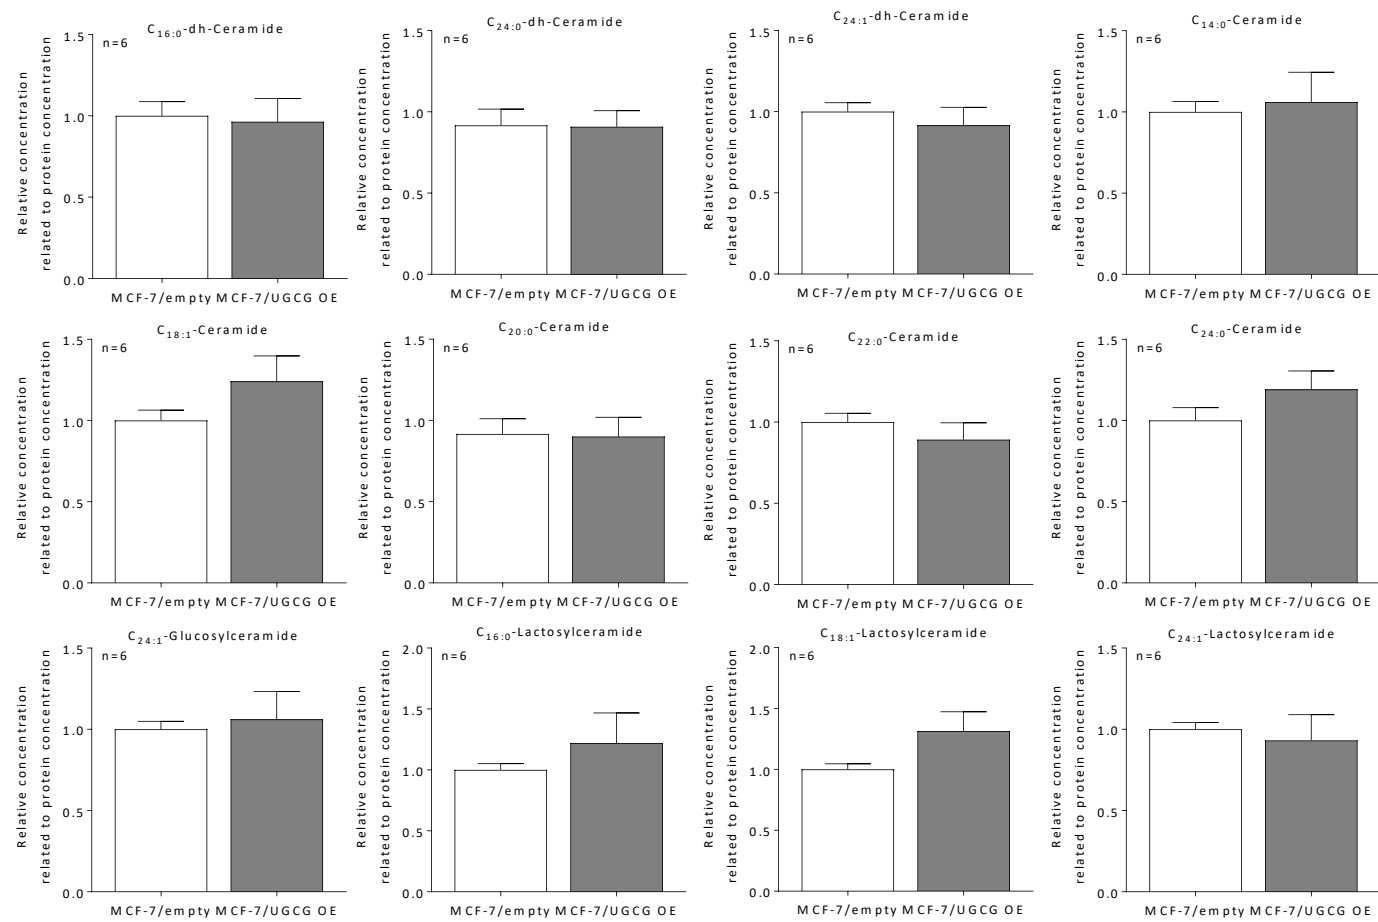

**Sphingolipid levels of mitochondria/ER fractions, which were not changed following UGCG overexpression. Levels were related to MCF-7/empty. dh-Ceramide = dihydro-ceramide. Data are presented as a mean of n = 6 ± SEM.**

A

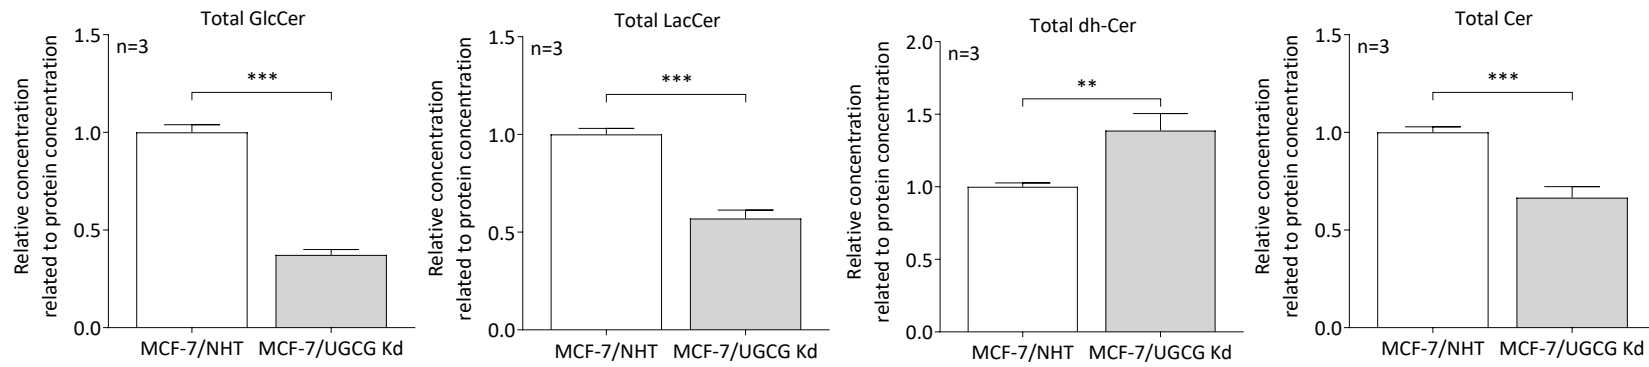

B

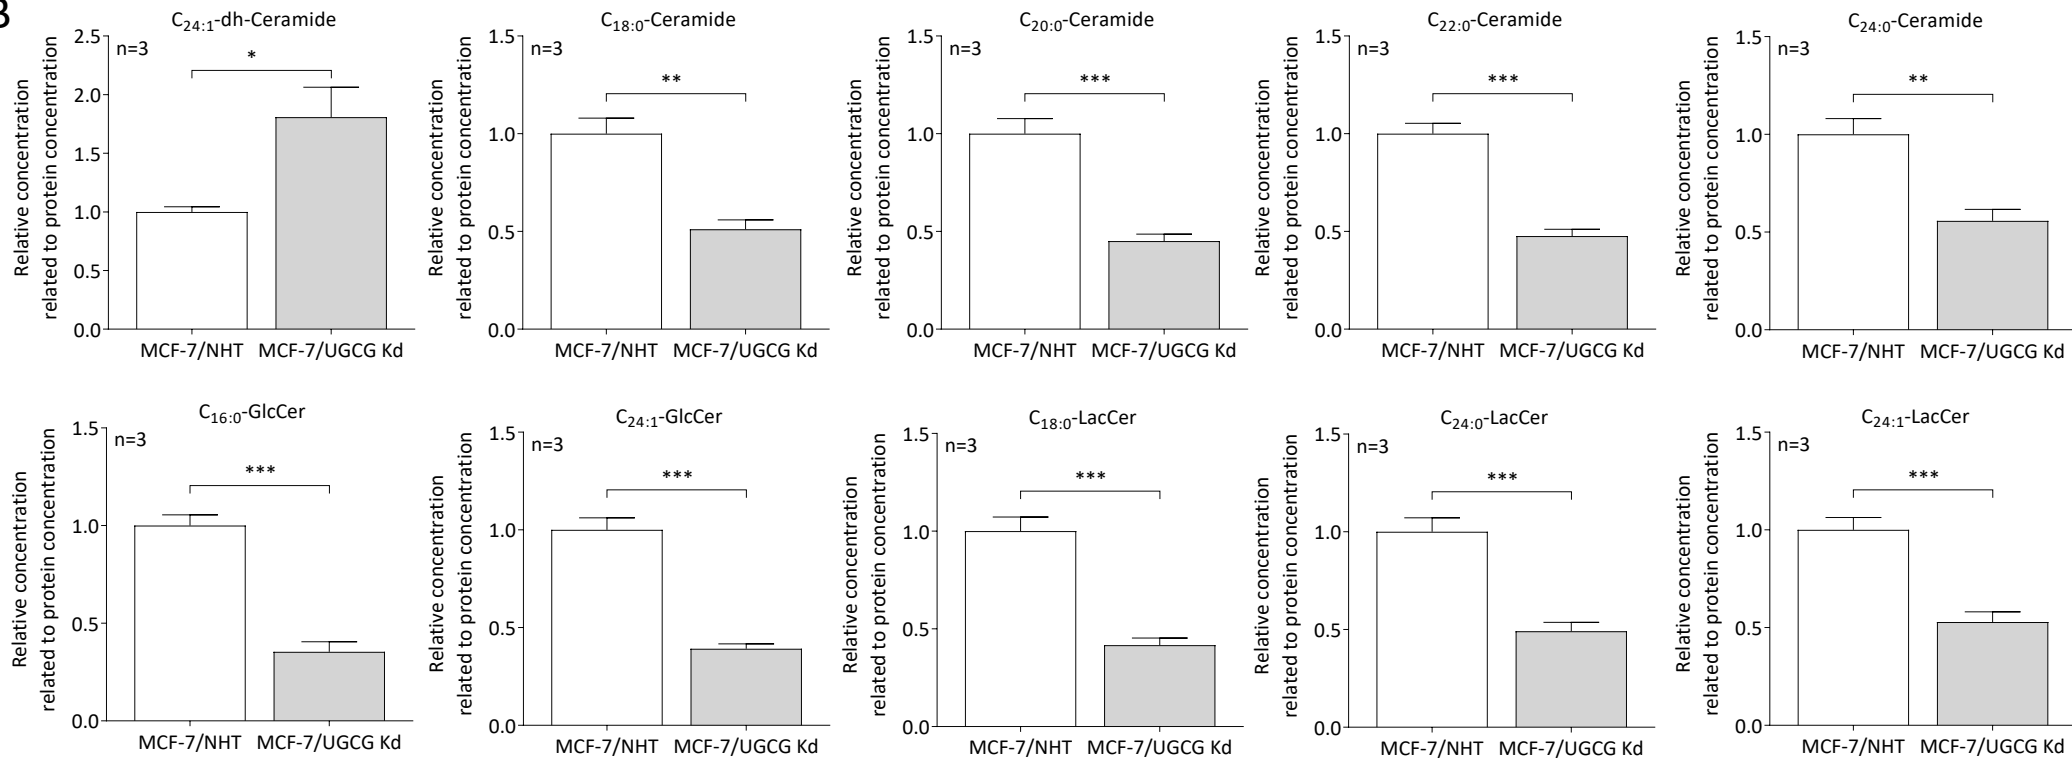

**Sphingolipid levels of mitochondria/ER fractions following UGCG Kd.** NHT = non-human target control. Levels were related to MCF-7/NHT. (A) Total glucosylceramide (GlcCer), lactosylceramide (LacCer), duhydro-ceramide (dh-Cer) and ceramide levels. (B) Analytes, which were significantly altered in MCF-7/UGCG Kd cells as compared to control cells. Data are presented as a mean of  $n = 3 \pm \text{SEM}$ . \* $p \leq 0.05$ , \*\* $p \leq 0.01$ , \*\*\* $p \leq 0.001$ .
